# Supplementary material
Source: PubMed Central journal article supplement (PMC7294728)
Supplement: ml0c00229_si_001.pdf [file ml0c00229_si_001.pdf]

## Supporting Information

### Discovery of Potent Small-Molecule Inhibitors of MLL Methyltransferase

*Ting-Rong Chern<sup>+‡†</sup>, Liu Liu<sup>+</sup>, Elyse Petrunak<sup>#</sup>, Jeanne A. Stuckey<sup>#</sup>, Mi Wang<sup>+</sup>, Denzil Bernard<sup>+†</sup>, Haibin Zhou<sup>±</sup>, Shirley Lee<sup>^</sup>, Yali Dou<sup>^</sup>, Shaomeng Wang<sup>+§†\*</sup>*

Departments of <sup>+</sup>Medicinal Chemistry, <sup>±</sup>Internal Medicine, <sup>§</sup>Pharmacology, <sup>^</sup>Pathology, and  
<sup>#</sup>Life Sciences Institute,

University of Michigan, Ann Arbor, MI 48109, USA

\* To whom correspondence should be addressed

Phone: 734-615-0362

Fax: (734) 764-2532 (Fax)

E-mail: [shaomeng@umich.edu](mailto:shaomeng@umich.edu)

**Experimental section:**

**In vitro histone methyltransferase (HMT) assay.** The HMT assay was performed as described previously.<sup>1</sup> Small molecule inhibitors were tested in reaction buffer consisting of 50 mM Tris–HCl, pH 8.0, 150 mM NaCl, and 10% glycerol. Equal stoichiometry of human MLL1 SET domain, WDR5, RbBP5 and ASH2L were mixed to form the active MLL1 complex at a final concentration of 125 nM. MLL1 complex were mixed with small molecules inhibitors at a final concentration of 10uM and incubated on ice. After 10 minutes the methyltransferase reaction was initiated by adding 1 μM of 3H-SAM and 4 μM of histone H3 (1–21) peptide. The reactions proceeded for 1 h at 22 °C and was terminated by adding 10 μL of reaction mixture onto Whatman P81 ion exchange filter paper. The filter paper was air dried and washed in three 10-min washes in 50 mM sodium bicarbonate pH 9.0 to remove excess SAM. Filter paper was heat-dried for 20 min and placed in 10 mL Ultima Gold scintillation fluid for 3H signal acquisition in the unit of counts per minute (c.p.m.).

### **Alpha LISA assay**

The method for Alpha LISA assay developed by our group has been described.<sup>2</sup>

**General Information:** The purity of compounds was determined by Waters ACQUITY UPLC and all the final compounds were >95% pure.

**Preparation of tert-butyl (S)-4-(((3aR,4R,6R,6aR)-6-(6-amino-9H-purin-9-yl)-2,2-dimethyltetrahydrofuro[3,4-d][1,3]dioxol-4-yl)methyl)amino)-2-((tert-butoxycarbonyl)amino)butanoate (20)**

Sodium triacetoxyborohydride (953.7 mg, 4.5 mmol) was added to a solution of 5'-amino-5'-deoxy-2',3'-o-(1-methylethylidene)-adenosine (918.9 mg, 3 mmol) and *t*-butyl (S)-2-[(tert-butoxycarbonyl)amino]-4-oxo-butanoate (819.9 mg, 3 mmol) in DCE and stirred at rt for 4 h. Then saturated sodium bicarbonate solution was added and stirring was continued for 20 min. The reaction mixture was extracted with DCM and the combined organic layers were dried over MgSO<sub>4</sub> and concentrated under reduced pressure. The compound was purified by preparative HPLC to give compound **20** (812.6 mg, 48 % yield). <sup>1</sup>H NMR (400 MHz, Methanol-*d*<sub>4</sub>) δ 8.41 (s, 1H), 8.40 (s, 1H), 6.37 (d, *J* = 2.2 Hz, 1H), 5.42 (dd, *J* = 6.3, 2.2 Hz, 1H), 5.19 (dd, *J* = 6.3, 3.9 Hz, 1H), 4.55 (dt, *J* = 9.8, 3.5 Hz, 1H), 4.04 (dd, *J* = 9.3, 5.0 Hz, 1H), 3.61 (dd, *J* = 13.1, 9.8 Hz, 1H), 3.51 (dd, *J* = 13.1, 3.3 Hz, 1H), 3.08 (t, *J* = 7.7 Hz, 2H), 2.14 (dt, *J* = 13.3, 4.7 Hz, 1H), 1.96 – 1.83 (m, 1H), 1.64 (s, 3H), 1.46 (s, 10H), 1.43 (s, 8H), 1.42 – 1.40 (m, 3H). ESI-MS *m/z* [M + H]<sup>+</sup> calculated = 564.31, found = 564.22.

**General method for preparation of compound 1-10.** Sodium triacetoxyborohydride (1.5 eq) was added to a solution of compound **20** (1 eq) and the corresponding aldehyde (1.2 eq) in DCE and stirred for 2 h at rt. Then saturated sodium bicarbonate solution was added and stirring was continued for 20 min. The reaction mixture was extracted with DCM. The combined organic layers dried over MgSO<sub>4</sub> and concentrated under reduced pressure. Then the crude product was dissolved in water/trifluoroacetic acid solution (1:4) and stirred for 16 h. The solvent was removed *in vacuo* and the compounds were purified directly by preparative HPLC to yield the desired product.

**(S)-2-amino-4-((((2R,3S,4R,5R)-5-(6-amino-9H-purin-9-yl)-3,4-dihydroxytetrahydrofuran-2-yl)methyl)(1-(3-cyclopentylpropyl)azetidin-3-yl)amino)butanoic acid (1)**

<sup>1</sup>H NMR (400 MHz, Methanol-*d*<sub>4</sub>) δ 8.36 (s, 1H), 8.34 (s, 1H), 6.02 (dd, *J* = 3.9, 1.4 Hz, 1H), 4.70 (t, *J* = 4.6 Hz, 1H), 4.29 (t, *J* = 5.9 Hz, 1H), 4.21 (s, 2H), 4.07 (t, *J* = 6.1 Hz, 1H), 3.93 (s, 3H), 3.16 – 3.08 (m, 3H), 2.83 (t, *J* = 6.6 Hz, 2H), 2.10 (dq, *J* = 31.9, 7.2 Hz, 2H), 1.77 (dt, *J* = 14.4, 8.8 Hz, 4H), 1.70 – 1.44 (m, 8H), 1.19 – 1.03 (m, 3H). ESI-MS *m/z* [M + H]<sup>+</sup> calculated = 533.31, found = 533.22.

**(S)-2-amino-4-((((2R,3S,4R,5R)-5-(6-amino-9H-purin-9-yl)-3,4-dihydroxytetrahydrofuran-2-yl)methyl)(2-aminoethyl)amino)butanoic acid (2)**

<sup>1</sup>H NMR (400 MHz, Methanol-*d*<sub>4</sub>) δ 8.45 (s, 1H), 8.43 (s, 1H), 6.07 (d, *J* = 3.6 Hz, 1H), 4.65 (dd, *J* = 5.5, 3.7 Hz, 1H), 4.32 (t, *J* = 5.9 Hz, 1H), 4.26 (d, *J* = 7.4 Hz, 1H), 4.05 (t, *J* = 6.3 Hz, 1H), 3.07 (q, *J* = 4.6 Hz, 4H), 2.99 – 2.85 (m, 4H), 2.17 (td, *J* = 17.3, 14.8, 7.4 Hz, 1H), 2.05 (s, 1H). ESI-MS *m/z* [M + H]<sup>+</sup> calculated = 411.20, found = 411.12.

**(S)-2-amino-4-((((2R,3S,4R,5R)-5-(6-amino-9H-purin-9-yl)-3,4-dihydroxytetrahydrofuran-2-yl)methyl)(3-((3-cyclopentylpropyl)amino)cyclobutyl)amino)butanoic acid (3)**

<sup>1</sup>H NMR (400 MHz, Methanol-*d*<sub>4</sub>) δ 8.38 (s, 1H), 8.37 (s, 1H), 6.08 (d, *J* = 3.6 Hz, 1H), 4.71 (dd, *J* = 5.4, 3.6 Hz, 1H), 4.44 (t, *J* = 5.8 Hz, 1H), 4.40 – 4.33 (m, 1H), 4.20 – 4.09 (m, 1H), 4.01 (dd, *J* = 7.8, 5.1 Hz, 1H), 3.80 (tdd, *J* = 7.4, 4.2, 1.7 Hz, 1H), 3.54 (dd, *J* = 14.5, 9.6 Hz, 1H), 3.43 (d, *J* = 14.1 Hz, 1H), 3.28 (t, *J* = 6.9 Hz, 2H), 2.95 – 2.88 (m, 2H), 2.84 – 2.73 (m, 2H), 2.66 – 2.48 (m, 2H), 2.35 – 2.27 (m, 1H), 2.19 – 2.09 (m, 1H), 1.87 – 1.78 (m, 3H), 1.76 – 1.57 (m, 6H), 1.41 (dt, *J* = 11.1, 6.3 Hz, 2H), 1.19 – 1.08 (m, 2H). ESI-MS *m/z* [M + H]<sup>+</sup> calculated = 547.33, found = 547.45.

**(S)-2-amino-4-((((2R,3S,4R,5R)-5-(6-amino-9H-purin-9-yl)-3,4-dihydroxytetrahydrofuran-2-yl)methyl)((1-butylazetidini-3-yl)methyl)amino)butanoic acid (4)**

<sup>1</sup>H NMR (400 MHz, Methanol-*d*<sub>4</sub>) δ 8.45 (s, 1H), 8.42 (d, *J* = 5.4 Hz, 1H), 6.11 (d, *J* = 3.8 Hz, 1H), 4.79 (dt, *J* = 27.8, 4.9 Hz, 1H), 4.68 (t, *J* = 4.1 Hz, 1H), 4.42 (d, *J* = 5.2 Hz, 2H), 4.29 (ddd, *J* = 17.4, 9.5, 4.7 Hz, 1H), 4.20 – 4.08 (m, 1H), 4.03 (dt, *J* = 7.7, 4.0 Hz, 1H), 3.98 – 3.83 (m, 1H), 3.59 – 3.38 (m, 5H), 3.37 (d, *J* = 8.0 Hz, 1H), 3.29 (t, *J* = 8.7 Hz, 1H), 3.17 (d, *J* = 21.3 Hz, 2H), 2.37 (dq, *J* = 15.0, 7.5 Hz, 1H), 2.17 (dd, *J* = 14.5, 6.2 Hz, 1H), 1.58 – 1.45 (m, 2H), 1.38 (q, *J* = 7.9, 7.3 Hz, 2H), 0.97 (t, *J* = 7.2 Hz, 3H). ESI-MS *m/z* [M + H]<sup>+</sup> calculated = 493.28, found = 493.11.

**(S)-2-amino-4-(((2R,3S,4R,5R)-5-(6-amino-9H-purin-9-yl)-3,4-dihydroxytetrahydrofuran-2-yl)methyl)((1-(furan-3-ylmethyl)azetidin-3-yl)methyl)amino)butanoic acid (5)**

<sup>1</sup>H NMR (400 MHz, Methanol-*d*<sub>4</sub>) δ 8.36 (dd, *J* = 8.8, 3.8 Hz, 2H), 7.73 (s, 1H), 7.64 – 7.57 (m, 1H), 6.54 (d, *J* = 1.8 Hz, 1H), 6.07 (t, *J* = 3.7 Hz, 1H), 4.69 (dd, *J* = 5.2, 3.7 Hz, 1H), 4.39 (qd, *J* = 9.5, 8.5, 4.3 Hz, 3H), 4.23 (s, 3H), 4.16 (d, *J* = 25.5 Hz, 2H), 3.97 (dd, *J* = 7.8, 4.9 Hz, 3H), 3.27 – 3.14 (m, 3H), 2.28 (dd, *J* = 15.8, 8.2 Hz, 1H), 2.11 – 2.01 (m, 1H), 1.42 (d, *J* = 4.9 Hz, 2H). ESI-MS *m/z* [M + H]<sup>+</sup> calculated = 517.24, found = 517.15.

**(S)-2-amino-4-(((2R,3S,4R,5R)-5-(6-amino-9H-purin-9-yl)-3,4-dihydroxytetrahydrofuran-2-yl)methyl)((1-(3-cyclopentylpropyl)azetidin-3-yl)methyl)amino)butanoic acid (6)**

<sup>1</sup>H NMR (400 MHz, Methanol-*d*<sub>4</sub>) δ 8.37 (s, 1H), 8.35 (s, 1H), 6.08 (d, *J* = 3.9 Hz, 1H), 4.71 (t, *J* = 4.5 Hz, 1H), 4.38 (qd, *J* = 7.3, 4.8, 3.9 Hz, 2H), 4.26 (s, 1H), 4.17 – 4.03 (m, 1H), 3.96 (dd, *J* = 7.9, 4.8 Hz, 1H), 3.86 (d, *J* = 22.2 Hz, 1H), 3.36 (d, *J* = 9.1 Hz, 3H), 3.32 – 3.04 (m, 6H), 2.30 (h, *J* = 7.3 Hz, 1H), 2.06 (dq, *J* = 15.1, 5.2 Hz, 1H), 1.85 – 1.73 (m, 3H), 1.69 – 1.60 (m, 2H), 1.59 – 1.48 (m, 4H), 1.34 (q, *J* = 7.2 Hz, 2H), 1.18 – 1.05 (m, 2H). ESI-MS *m/z* [M + H]<sup>+</sup> calculated = 547.33, found = 547.45.

**(S)-2-amino-4-((((2R,3S,4R,5R)-5-(6-amino-9H-purin-9-yl)-3,4-dihydroxytetrahydrofuran-2-yl)methyl)((1-(3-phenylpropyl)azetidin-3-yl)methyl)amino)butanoic acid (7)**

$^1\text{H}$  NMR (400 MHz, Methanol- $d_4$ )  $\delta$  8.32 (d,  $J = 2.8$  Hz, 2H), 7.34 – 7.28 (m, 2H), 7.24 – 7.19 (m, 3H), 6.08 – 6.03 (m, 1H), 4.71 (dd,  $J = 5.3, 3.7$  Hz, 1H), 4.39 (t,  $J = 5.8$  Hz, 1H), 4.33 (s, 2H), 4.13 – 4.02 (m, 1H), 3.95 (t,  $J = 6.3$  Hz, 2H), 3.27 (s, 4H), 3.14 (s, 5H), 2.68 (t,  $J = 7.5$  Hz, 2H), 2.25 (d,  $J = 14.3$  Hz, 1H), 2.03 (s, 1H), 1.84 (q,  $J = 7.9$  Hz, 2H), 1.44 – 1.29 (m, 1H). ESI-MS  $m/z$  [ $M + H$ ] $^+$  calculated = 555.30, found = 555.22.

**(S)-2-amino-4-((((2R,3S,4R,5R)-5-(6-amino-9H-purin-9-yl)-3,4-dihydroxytetrahydrofuran-2-yl)methyl)(3-((3-phenylpropyl)amino)propyl)amino)butanoic acid (8)**

$^1\text{H}$  NMR (400 MHz, Methanol- $d_4$ )  $\delta$  8.27 (d,  $J = 4.1$  Hz, 2H), 7.32 – 7.26 (m, 2H), 7.19 (dd,  $J = 12.6, 7.1$  Hz, 3H), 6.04 (d,  $J = 3.8$  Hz, 1H), 4.78 – 4.73 (m, 1H), 4.46 – 4.42 (m, 1H), 3.85 (dd,  $J = 8.9, 3.8$  Hz, 1H), 3.50 (dt,  $J = 3.3, 1.6$  Hz, 1H), 3.42 – 3.39 (m, 1H), 3.30 – 3.25 (m, 1H), 3.15 (dt,  $J = 3.3, 1.6$  Hz, 1H), 2.98 – 2.92 (m, 2H), 2.67 (t,  $J = 7.0$  Hz, 2H), 2.23 – 2.19 (m, 1H), 2.09 – 1.95 (m, 5H), 1.67 (s, 5H). ESI-MS  $m/z$  [ $M + H$ ] $^+$  calculated = 543.30, found = 543.21.

**(S)-2-amino-4-((((2R,3S,4R,5R)-5-(6-amino-9H-purin-9-yl)-3,4-dihydroxytetrahydrofuran-2-yl)methyl)(3-(((3-phenylpropyl)amino)methyl)cyclobutyl)amino)butanoic acid (9)**

$^1\text{H}$  NMR (400 MHz, Methanol- $d_4$ )  $\delta$  8.29 (d,  $J = 2.7$  Hz, 2H), 7.29 (t,  $J = 7.5$  Hz, 2H), 7.25 – 7.14 (m, 3H), 6.06 (d,  $J = 3.2$  Hz, 1H), 4.70 (t,  $J = 4.3$  Hz, 1H), 4.51 (t,  $J = 5.9$  Hz, 1H), 4.39 (t,  $J = 8.2$  Hz, 1H), 3.85 (d,  $J = 6.4$  Hz, 2H), 3.64 (t,  $J = 12.2$  Hz, 2H), 3.09 (s, 1H), 3.07 (s, 1H), 3.02 – 2.93 (m, 2H), 2.70 (t,  $J = 7.2$  Hz, 2H), 2.61 – 2.54 (m, 2H), 2.24 – 2.16 (m, 1H), 2.04 (ddt,  $J = 23.9, 19.0, 10.1$  Hz, 4H), 1.71 (q,  $J = 5.4, 3.3$  Hz, 4H). ESI-MS  $m/z$  [ $M + H$ ] $^+$  calculated = 569.31, found = 569.49.

**(S)-2-amino-4-((((2R,3S,4R,5R)-5-(6-amino-9H-purin-9-yl)-3,4-dihydroxytetrahydrofuran-2-yl)methyl)(3-(((3-phenylpropyl)amino)methyl)cyclobutyl)amino)butanoic acid (10)**

<sup>1</sup>H NMR (400 MHz, Methanol-*d*<sub>4</sub>) δ 8.30 (s, 2H), 7.79 (s, 1H), 7.29 – 7.19 (m, 3H), 7.16 – 7.08 (m, 2H), 6.06 (d, *J* = 4.1 Hz, 1H), 4.76 – 4.71 (m, 1H), 4.71 – 4.62 (m, 2H), 4.47 – 4.41 (m, 1H), 4.34 (t, *J* = 5.4 Hz, 1H), 4.22 (s, 2H), 3.87 (t, *J* = 6.4 Hz, 1H), 3.27 (d, *J* = 11.6 Hz, 1H), 3.21 (t, *J* = 6.9 Hz, 3H), 3.17 – 3.13 (m, 1H), 2.35 – 2.25 (m, 1H), 2.10 – 2.02 (m, 1H), 1.42 – 1.36 (m, 1H).

ESI-MS *m/z* [M + H]<sup>+</sup> calculated = 553.26, found = 553.19.

**Preparation of tert-butyl (S)-4-((((3aR,4R,6R,6aR)-6-(6-amino-9H-purin-9-yl)-2,2-dimethyltetrahydrofuro[3,4-d][1,3]dioxol-4-yl)methyl)(azetidino-3-ylmethyl)amino)-2-((tert-butoxycarbonyl)amino)butanoate (21)**

Benzyl 3-formylazetidino-1-carboxylate (263.1 mg, 1.2 mmol) and sodium triacetoxyborohydride (317.91 mg, 1.5 mmol) in DCE were added to a solution of 5'-deoxy-5'-[[[(3S)-4-(1,1-dimethylethoxy)-3-[[[(1,1-dimethylethoxy)carbonyl]amino]-4-oxobutyl]amino]-2',3'-O-(1-methylethylidene)adenosine (563.7 mg, 1 mmol) and stirred for 3 h at rt. Then saturated sodium bicarbonate solution was added and stirring was continued for 20 min. The reaction mixture was extracted with DCM and the combined organic layers were dried over MgSO<sub>4</sub> and concentrated under reduced pressure. Then the crude product was dissolved in MeOH, Pd/C (0.05%) was added and the mixture was stirred under a hydrogen atmosphere. The black particles were filtered off and washed with MeOH several times. The filtrate was then concentrated under reduced pressure and purified by preparative HPLC to give compound **21** (266.2 mg, 42% yield). <sup>1</sup>H NMR (400 MHz, Methanol-*d*<sub>4</sub>) δ 8.52 – 8.39 (m, 2H), 6.38 (d, *J* = 2.1 Hz, 1H), 5.36 (d, *J* = 6.3 Hz, 1H), 5.13 (d, *J*

= 5.5 Hz, 1H), 4.64 (s, 1H), 4.25 – 4.08 (m, 2H), 3.97 (s, 3H), 3.60 (s, 2H), 3.54 – 3.36 (m, 3H), 3.25 (s, 1H), 3.18 – 2.92 (m, 2H), 2.13 (d,  $J = 63.5$  Hz, 2H), 1.81 (s, 1H), 1.64 (d,  $J = 6.2$  Hz, 2H), 1.52 – 1.50 (m, 1H), 1.45 (d,  $J = 1.9$  Hz, 15H), 1.40 (s, 3H), 1.32 (d,  $J = 9.8$  Hz, 1H). ESI-MS  $m/z$   $[M + H]^+$  calculated = 633.36, found = 633.28.

**General method for synthesis of compound 11-18.** Sodium triacetoxyborohydride (1.5 eq) was added to a solution of compound **21** (1 eq) and the corresponding aldehyde (1.2 eq) in DCE and stirred for 2 h at rt. Then saturated sodium bicarbonate solution was added and stirring was continued for 20 min. The reaction mixture was extracted with DCM. The combined organic layers dried over  $MgSO_4$  and concentrated under reduced pressure. Then the crude product was dissolved in water/trifluoroacetic acid solution (1:4) and stirred for 16 h. The solvent was removed *in vacuo* and the compounds were purified directly by preparative HPLC to yield the desired product.

**(S)-2-amino-4-(((2R,3S,4R,5R)-5-(6-amino-9H-purin-9-yl)-3,4-dihydroxytetrahydrofuran-2-yl)methyl)((1-benzylazetid-3-yl)methyl)amino)butanoic acid (11)**

$^1H$  NMR (400 MHz, Methanol- $d_4$ )  $\delta$  8.34 – 8.19 (m, 2H), 7.57 – 7.37 (m, 5H), 6.01 (d,  $J = 3.8$  Hz, 1H), 4.80 – 4.70 (m, 1H), 4.44 – 4.29 (m, 3H), 4.30 – 4.01 (m, 4H), 3.94 (dt,  $J = 24.7, 9.0$  Hz, 2H), 3.80 (s, 1H), 3.22 – 3.13 (m, 1H), 3.11 – 2.83 (m, 5H), 2.23 – 2.11 (m, 1H), 1.97 (dt,  $J = 14.8, 6.0$  Hz, 1H). ESI-MS  $m/z$   $[M + H]^+$  calculated = 527.27, found = 527.15.

**(S)-2-amino-4-(((2R,3S,4R,5R)-5-(6-amino-9H-purin-9-yl)-3,4-dihydroxytetrahydrofuran-2-yl)methyl)((1-(3-chlorobenzyl)azetid-3-yl)methyl)amino)butanoic acid (12)**

$^1H$  NMR (400 MHz, Methanol- $d_4$ )  $\delta$  8.43 (s, 1H), 8.40 (s, 1H), 7.54 – 7.36 (m, 4H), 6.10 (d,  $J = 3.7$  Hz, 1H), 4.67 (dd,  $J = 4.8, 3.7$  Hz, 1H), 4.44 – 4.34 (m, 4H), 4.29 – 4.14 (m, 2H), 4.12 – 3.96 (m, 3H), 3.44 (tdd,  $J = 20.2, 9.2, 6.4$  Hz, 5H), 3.26 (dq,  $J = 13.2, 6.8, 6.2$  Hz, 2H), 2.34 (dq,  $J =$



14.9, 7.4 Hz, 1H), 2.13 (dq,  $J = 14.7, 5.8$  Hz, 1H). ESI-MS  $m/z$   $[M + H]^+$  calculated = 561.23, found = 561.12.

**(S)-2-amino-4-(((2R,3S,4R,5R)-5-(6-amino-9H-purin-9-yl)-3,4-dihydroxytetrahydrofuran-2-yl)methyl)((1-(2-chlorobenzyl)azetidin-3-yl)methyl)amino)butanoic acid (13)**

$^1\text{H}$  NMR (400 MHz, Methanol- $d_4$ )  $\delta$  8.41 (s, 1H), 8.38 (s, 1H), 7.52 (ddd,  $J = 7.4, 3.0, 1.6$  Hz, 2H), 7.42 (dtd,  $J = 23.7, 7.4, 1.5$  Hz, 2H), 6.07 (d,  $J = 3.6$  Hz, 1H), 4.62 (dd,  $J = 4.9, 3.5$  Hz, 1H), 4.54 (s, 2H), 4.36 (dd,  $J = 5.7, 3.1$  Hz, 2H), 4.32 – 4.27 (m, 1H), 4.22 (td,  $J = 8.8, 7.8, 4.9$  Hz, 1H), 4.11 (ddd,  $J = 19.8, 10.6, 7.3$  Hz, 2H), 3.99 (dd,  $J = 7.7, 5.2$  Hz, 1H), 3.47 – 3.34 (m, 5H), 3.25 (dd,  $J = 13.8, 6.9$  Hz, 2H), 2.30 (dt,  $J = 14.9, 7.4$  Hz, 1H), 2.13 (ddd,  $J = 11.8, 9.7, 6.0$  Hz, 1H). ESI-MS  $m/z$   $[M + H]^+$  calculated = 561.23, found = 561.12.

**(S)-2-amino-4-(((2R,3S,4R,5R)-5-(6-amino-9H-purin-9-yl)-3,4-dihydroxytetrahydrofuran-2-yl)methyl)((1-(4-chlorobenzyl)azetidin-3-yl)methyl)amino)butanoic acid (14)**

$^1\text{H}$  NMR (400 MHz, Methanol- $d_4$ )  $\delta$  8.43 (s, 1H), 8.40 (s, 1H), 7.49 – 7.43 (m, 4H), 6.10 (d,  $J = 3.7$  Hz, 1H), 4.67 (dd,  $J = 4.9, 3.6$  Hz, 1H), 4.43 – 4.34 (m, 4H), 4.26 – 4.20 (m, 1H), 4.16 (td,  $J = 8.5, 7.6, 4.5$  Hz, 1H), 4.10 – 3.98 (m, 3H), 3.42 (ddd,  $J = 20.3, 9.0, 4.5$  Hz, 5H), 3.24 (dq,  $J = 13.3, 6.4$  Hz, 2H), 2.33 (dd,  $J = 14.9, 7.4$  Hz, 1H), 2.16 – 2.08 (m, 1H). ESI-MS  $m/z$   $[M + H]^+$  calculated = 561.23, found = 561.10.

**(S)-2-amino-4-(((2R,3S,4R,5R)-5-(6-amino-9H-purin-9-yl)-3,4-dihydroxytetrahydrofuran-2-yl)methyl)((1-(thiophen-2-ylmethyl)azetidin-3-yl)methyl)amino)butanoic acid (15)**

<sup>1</sup>H NMR (400 MHz, Methanol-d<sub>4</sub>) δ 8.34 (s, 1H), 8.32 (s, 1H), 7.62 (s, 1H), 7.57 (dd, J = 5.0, 3.1 Hz, 1H), 7.16 (d, J = 5.2 Hz, 1H), 6.05 (d, J = 3.9 Hz, 1H), 4.70 (dd, J = 5.2, 3.5 Hz, 1H), 4.48 – 3.89 (m, 9H), 3.31 – 3.07 (m, 6H), 2.35 – 2.19 (m, 1H), 2.09 – 1.97 (m, 1H), 1.32 (s, 1H). ESI-MS *m/z* [M + H]<sup>+</sup> calculated = 533.22, found = 533.10.

**(S)-2-amino-4-((((2R,3S,4R,5R)-5-(6-amino-9H-purin-9-yl)-3,4-dihydroxytetrahydrofuran-2-yl)methyl)((1-(thiophen-2-ylmethyl)azetidin-3-yl)methyl)amino)butanoic acid (16)**

<sup>1</sup>H NMR (400 MHz, Methanol-d<sub>4</sub>) δ 8.33 (d, J = 5.3 Hz, 2H), 7.60 (dd, J = 5.1, 1.2 Hz, 1H), 7.30 – 7.23 (m, 1H), 7.13 (dd, J = 5.1, 3.5 Hz, 1H), 6.05 (d, J = 3.7 Hz, 1H), 4.69 (dd, J = 5.4, 3.7 Hz, 1H), 4.57 (s, 2H), 4.38 (t, J = 5.9 Hz, 1H), 4.35 – 4.29 (m, 1H), 4.23 (t, J = 8.9 Hz, 1H), 4.14 (t, J = 9.3 Hz, 1H), 3.99 (dt, J = 22.6, 7.7 Hz, 3H), 3.30 – 3.08 (m, 7H), 2.25 (dd, J = 14.9, 7.3 Hz, 1H), 2.08 – 1.96 (m, 1H). ESI-MS *m/z* [M + H]<sup>+</sup> calculated = 533.22, found = 533.13.

**(S)-2-amino-4-((((2R,3S,4R,5R)-5-(6-amino-9H-purin-9-yl)-3,4-dihydroxytetrahydrofuran-2-yl)methyl)((1-(benzofuran-3-ylmethyl)azetidin-3-yl)methyl)amino)butanoic acid (17)**

<sup>1</sup>H NMR (400 MHz, Methanol-d<sub>4</sub>) δ 8.34 (s, 1H), 8.32 (s, 1H), 7.66 (dt, J = 7.8, 1.0 Hz, 1H), 7.53 (dd, J = 8.3, 1.0 Hz, 1H), 7.39 (ddd, J = 8.5, 7.2, 1.4 Hz, 1H), 7.30 (td, J = 7.5, 1.0 Hz, 1H), 7.06 (s, 1H), 6.05 (d, J = 3.9 Hz, 1H), 4.70 (dd, J = 5.2, 3.8 Hz, 1H), 4.60 (s, 2H), 4.40 – 4.22 (m, 5H), 4.14 (dd, J = 10.8, 7.1 Hz, 1H), 4.08 (dd, J = 10.7, 7.0 Hz, 1H), 3.94 (dd, J = 7.6, 5.1 Hz, 1H), 3.31 – 3.20 (m, 4H), 3.17 – 3.11 (m, 2H), 2.25 (dt, J = 14.8, 7.5 Hz, 1H), 2.08 – 1.98 (m, 1H). ESI-MS *m/z* [M + H]<sup>+</sup> calculated = 567.26, found = 567.14.

**(S)-2-amino-4-((((2R,3S,4R,5R)-5-(6-amino-9H-purin-9-yl)-3,4-dihydroxytetrahydrofuran-2-yl)methyl)((1-(3,3-diphenylpropyl)azetidin-3-yl)methyl)amino)butanoic acid (18)**

<sup>1</sup>H NMR (400 MHz, Methanol-d<sub>4</sub>) δ 8.39 (s, 1H), 8.37 (s, 1H), 7.32 – 7.26 (m, 8H), 7.20 (ddd, J = 8.6, 5.6, 2.3 Hz, 2H), 6.07 (d, J = 3.7 Hz, 1H), 4.65 (dd, J = 4.9, 3.7 Hz, 1H), 4.42 – 3.71 (m, 9H), 3.41 – 3.33 (m, 3H), 3.27 – 3.06 (m, 5H), 2.28 (dq, J = 13.8, 7.5 Hz, 3H), 2.06 (dt, J = 15.3, 5.4 Hz, 1H). ESI-MS *m/z* [M + H]<sup>+</sup> calculated = 631.33, found = 631.20.

#### Cloning, Expression, Purification of MLL1 SET<sup>IL</sup> Mutant

All crystallization experiments were carried out with a construct of the MLL1 SET domain 3813-3969 containing N3861I and Q3867L mutations (MLL1 SET<sup>IL</sup>) and expressed with an N-terminal 6xHis-SUMO tag. *Escherichia coli* Rosetta 2 (DE3) cells transformed with pET28a containing the gene for MLL1 SET<sup>IL</sup> were grown in Terrific Broth supplemented with 30 mg/mL kanamycin and 100 μM zinc acetate. Expression was induced by addition of 0.4 mM IPTG once cells reached an OD<sub>600</sub> of 1.0. Cells were incubated at 20 °C for 18 hours, harvested by centrifugation at 6700 xg and frozen at -80 °C.

MLL1 SET<sup>IL</sup> was purified by resuspending cells from 1 L expression media in 40 mL lysis buffer containing 50 mM Tris-HCl pH 8.0, 400 mM NaCl, 10% glycerol, 10 mM MgCl<sub>2</sub>, 2 μL Benzonase Nuclease (EMD Millipore), 10 μg/mL aprotinin, 1 μg/mL leupeptin, and 0.1% β-mercaptoethanol. Cells were lysed by sonication and lysate cleared by centrifugation at 34000 xg. Lysate was incubated with Ni-NTA (Qiagen) resin at 4 °C for 1 hour and washed with buffer containing 50 mM Tris-HCl pH 8.0, 400 mM NaCl, 10% glycerol, and 10 mM imidazole. Protein was eluted in buffer 50 mM Tris-HCl pH 8.0, 400 mM NaCl, 10% glycerol, 300 mM imidazole. Eluted protein was dialyzed in 50 mM Tris-HCl pH 8.0, 400 mM NaCl, 10% glycerol, 1 mM DTT, and the 6xHis-SUMO tag was cleaved by digestion with SUMO Protease ULP1 overnight, and removed by incubation with Ni-NTA resin. MLL1 SET<sup>IL</sup> was further purified by size exclusion chromatography on a HiLoad 26/60 Superdex 75 prep grade column (GE Healthcare) pre-

equilibrated with 50 mM Tris-HCl pH 8.0, 300 mM NaCl, and 10% glycerol. Purified protein was concentrated to 15 mg/mL and stored at -80 °C.

#### *Crystallization and Structure Determination of MLL1 SET<sup>IL</sup> Mutant*

Concentrated MLL1 SET<sup>IL</sup> was incubated with 2 mM S-adenosyl-L-homocysteine at 4 °C for 1 hour and crystallized by sitting drop vapor diffusion at 4 °C. Crystals formed in drops containing a 1:1 ratio of protein to well solution containing 2.1-2.2 M sodium malonate pH 7.0. Crystals were transferred into a soak solution containing 2.1-2.2 M sodium malonate pH 7.0, 20% ethylene glycol, and 10 mM inhibitor. After 24 hours, crystals were removed from the soak solution and flash-frozen in liquid nitrogen. Diffraction data were collected on the Advanced Photon Source LS-CAT beamline 21-ID-G (Table S1) and processed with HKL2000<sup>3</sup>. Structures with inhibitors were solved by molecular replacement in Phaser<sup>4</sup> using the published structure of MLL SET<sup>IL</sup> (PDB ID: 5F5E)<sup>5</sup> as a search model absent its ligand. Iterative model building and refinement were performed using COOT<sup>6</sup> and BUSTER<sup>7</sup>, respectively. Ligand coordinates and restraints were generated in Grade<sup>8</sup>.

The structure of MLL1 SET<sup>IL</sup> with inhibitors TC-5109, TC-5139, TC-5140, and TC-5153 were solved in the space group P32 with two chains of protein per asymmetric unit. There was a high degree of similarity between the two polypeptide chains (average RMSD based on SSM superposition in COOT of  $0.2 \pm 0.1$  Å) and between the structures themselves (average RMSD based on SSM superposition in COOT of  $0.34 \pm 0.07$  Å).

Table S1: Crystallography Data Collection and Refinement Statistics

| <b>Data Collection</b>         | <b>TC-511</b>                                                                        | <b>TC-5139</b>                                                                       | <b>TC-5140</b>                                                                       | <b>TC-5153</b>                                                                       |
|--------------------------------|--------------------------------------------------------------------------------------|--------------------------------------------------------------------------------------|--------------------------------------------------------------------------------------|--------------------------------------------------------------------------------------|
| PDBID                          | 6U9M                                                                                 | 6U9N                                                                                 | 6U9R                                                                                 | 6U9K                                                                                 |
| Space Group                    | P32                                                                                  | P32                                                                                  | P32                                                                                  | P32                                                                                  |
| Unit Cell (Å)                  | a = b = 54.810<br>c = 105.827<br>$\alpha = \beta = 90^\circ$<br>$\gamma = 120^\circ$ | a = b = 54.629<br>c = 105.832<br>$\alpha = \beta = 90^\circ$<br>$\gamma = 120^\circ$ | a = b = 54.692<br>c = 105.530<br>$\alpha = \beta = 90^\circ$<br>$\gamma = 120^\circ$ | a = b = 54.949<br>c = 104.895<br>$\alpha = \beta = 90^\circ$<br>$\gamma = 120^\circ$ |
| Wavelength (Å)                 | 0.9786                                                                               | 0.9786                                                                               | 0.9786                                                                               | 0.9786                                                                               |
| Resolution (Å) <sup>1</sup>    | 2.05 (2.09 - 2.05)                                                                   | 1.95 (1.98 - 1.95)                                                                   | 2.10 (2.14 - 2.10)                                                                   | 2.00 (2.03-2.00)                                                                     |
| Rsym <sup>2</sup>              | 0.066 (0.687)                                                                        | 0.046 (0.574)                                                                        | 0.066 (0.819)                                                                        | 0.050 (0.559)                                                                        |
| $\langle I/\sigma I \rangle^3$ | 10 (2)                                                                               | 10 (2)                                                                               | 10 (2)                                                                               | 10 (2)                                                                               |
| Completeness (%)               | 100 (100)                                                                            | 100 (100)                                                                            | 100 (100)                                                                            | 100 (100)                                                                            |
| Redundancy                     | 7.8 (7.7)                                                                            | 7.8 (7.7)                                                                            | 8.7 (8.8)                                                                            | 7.8 (7.7)                                                                            |
| <b>Refinement</b>              |                                                                                      |                                                                                      |                                                                                      |                                                                                      |
| Resolution (Å)                 | 2.05                                                                                 | 1.95                                                                                 | 2.1                                                                                  | 2.0                                                                                  |
| R-Factor <sup>5</sup>          | 22.69                                                                                | 22.69                                                                                | 21.45                                                                                | 20.69                                                                                |
| Rfree <sup>6</sup>             | 24.81                                                                                | 24.81                                                                                | 25.17                                                                                | 24.41                                                                                |
| Protein atoms                  | 2293                                                                                 | 2237                                                                                 | 2264                                                                                 | 2293                                                                                 |
| Ligands                        | 2                                                                                    | 2                                                                                    | 2                                                                                    | 2                                                                                    |
| Water Molecules                | 164                                                                                  | 191                                                                                  | 146                                                                                  | 167                                                                                  |
| Unique Reflections             | 22301                                                                                | 25710                                                                                | 20546                                                                                | 23928                                                                                |
| R.m.s.d. <sup>7</sup>          |                                                                                      |                                                                                      |                                                                                      |                                                                                      |
| Bonds                          | 0.008                                                                                | 0.010                                                                                | 0.010                                                                                | 0.010                                                                                |
| Angles                         | 1.00                                                                                 | 1.05                                                                                 | 1.04                                                                                 | 1.02                                                                                 |
| MolProbity Score               | 1.67                                                                                 | 1.63                                                                                 | 1.83                                                                                 | 1.59                                                                                 |
| Clash Score <sup>8</sup>       | 3.92                                                                                 | 3.40                                                                                 | 3.78                                                                                 | 2.18                                                                                 |

|                   |           |           |           |           |
|-------------------|-----------|-----------|-----------|-----------|
| RSCC <sup>9</sup> | 0.88/0.91 | 0.88/0.88 | 0.84/0.87 | 0.92/0.92 |
| RSR <sup>9</sup>  | 0.17/0.19 | 0.17/0.17 | 0.20/0.17 | 0.14/0.15 |

<sup>1</sup>Statistics for highest resolution bin of reflections in parentheses.

<sup>2</sup> $R_{\text{sym}} = \sum_h \sum_j |I_{hj} - \langle I_h \rangle| / \sum_h \sum_j I_{hj}$ , where  $I_{hj}$  is the intensity of observation  $j$  of reflection  $h$  and  $\langle I_h \rangle$  is the mean intensity for multiply recorded reflections.

<sup>3</sup>Intensity signal-to-noise ratio.

<sup>4</sup>Completeness of the unique diffraction data.

<sup>5</sup> $R\text{-factor} = \sum_h | |F_o I - |F_c I || / \sum_h |F_o|$ , where  $F_o$  and  $F_c$  are the observed and calculated structure factor amplitudes for reflection  $h$ .

<sup>6</sup> $R_{\text{free}}$  is calculated against a 5% random sampling of the reflections that were removed before structure refinement.

<sup>7</sup>Root mean square deviation of bond lengths and bond angles.

<sup>8</sup>Chen et al. (2010) MolProbity: all-atom structure validation for macromolecular crystallography. Acta Crystallographica D66:12-21.

<sup>9</sup>wwPDB Validation Server.

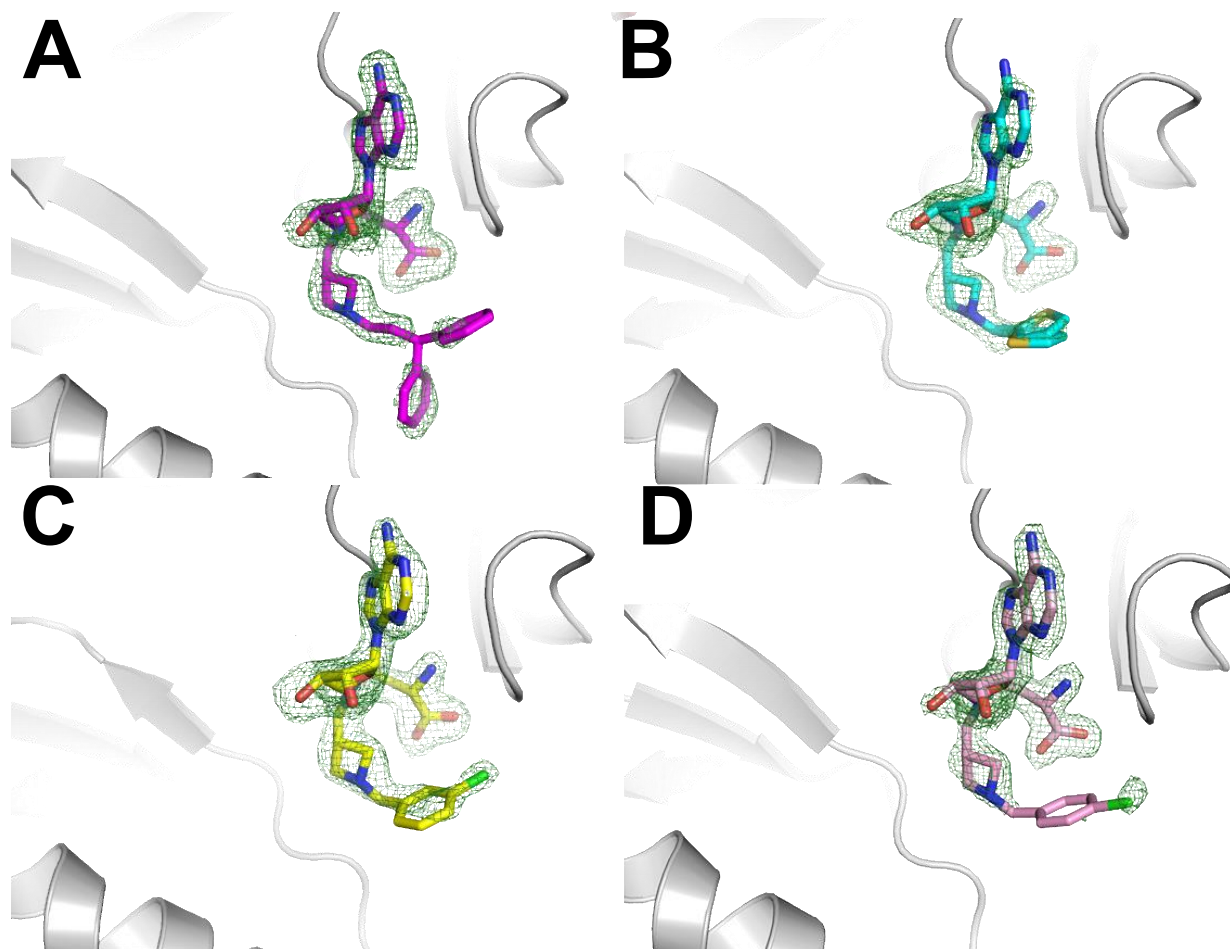

Figure S1: Ligand omit density (green mesh) for inhibitors TC-5153 (panel A, magenta sticks), TC-5109 (panel B, cyan sticks), TC-5140 (panel C, yellow sticks), and TC-5139 (panel D, pink sticks). Fo-Fc density shown is contoured to  $3\sigma$ . Electron density associated with the thiophenyl substituent of TC-5109 does not confirm a single orientation of the thiophene ring, and it is thus shown modeled in two plausible orientations.

## REFERENCE

(1) Dou, Y.; Milne, T. A.; Tackett, A. J.; Smith, E. R.; Fukuda, A.; Wysocka, J.; Allis, C. D.; Chait, B. T.; Hess, J. L.; Roeder, R. G. Physical association and coordinate function of the H3 K4 methyltransferase MLL1 and the H4 K16 acetyltransferase MOF. *Cell* **2005**, *121*, 873-885.

(2) Karatas, H.; Li, Y.; Liu, L.; Ji, J.; Lee, S.; Chen, Y.; Yang, J.; Huang, L.; Bernard, D.; Xu, J.; Townsend, E. C.; Cao, F.; Ran, X.; Li, X.; Wen, B.; Sun, D.; Stuckey, J. A.; Lei, M.; Dou, Y.; Wang, S. Discovery of a Highly Potent, Cell-Permeable Macrocyclic Peptidomimetic (MM-589) Targeting the WD Repeat Domain 5 Protein (WDR5)-Mixed Lineage Leukemia (MLL) Protein-Protein Interaction. *J Med Chem* **2017**, *60*, 4818-4839.

- (3) Otwinowski, Z.; Minor, W. Processing of X-ray diffraction data collected in oscillation mode. *Methods Enzymol* **1997**, *276*, 307-326.
- (4) McCoy, A. J.; Grosse-Kunstleve, R. W.; Adams, P. D.; Winn, M. D.; Storoni, L. C.; Read, R. J. Phaser crystallographic software. *J Appl Crystallogr* **2007**, *40*, 658-674.
- (5) Li, Y.; Han, J.; Zhang, Y.; Cao, F.; Liu, Z.; Li, S.; Wu, J.; Hu, C.; Wang, Y.; Shuai, J.; Chen, J.; Cao, L.; Li, D.; Shi, P.; Tian, C.; Zhang, J.; Dou, Y.; Li, G.; Chen, Y.; Lei, M. Structural basis for activity regulation of MLL family methyltransferases. *Nature* **2016**, *530*, 447-452.
- (6) Emsley, P.; Lohkamp, B.; Scott, W. G.; Cowtan, K. Features and development of Coot. *Acta Crystallogr D Biol Crystallogr* **2010**, *66*, 486-501.
- (7) Bricogne, G.; Blanc, E.; Brandl, M.; Flensburg, C.; Keller, P.; Paciorek, W.; Roversi, P.; Sharff, A.; Smart, O. S.; Vonrhein, C.; Womack, T. O.: BUSTER. 2.10.3 ed.; Global Phasing Ltd.: Cambridge, United Kingdom, 2017.
- (8) Smart, O. S.; Womack, T. O.; Sharff, A.; Flensburg, C.; Keller, P.; Paciorek, W.; Vonrhein, C.; Bricogne, G.: GRADE. 1.2.13 ed.; Global Phasing Ltd.: Cambridge, United Kingdom, 2017.
